# Supplementary material for: Increased Accessibility to Primary Healthcare Due to Nurse Prescribing of Medicines
Source: MDPI journal article supplement (doi:10.3390/ijerph19010292), 2021-12-28
Supplement: s1 [file s1]

Table S1. The list of products most frequently prescribed by doctors and nurses at MDC Siedlce.

|    | <b>The most common medications in 2019 MD (according to the ABC method)</b>         | <b>The most common medications in 2019 Nurses (according to the ABC method)</b> |
|----|-------------------------------------------------------------------------------------|---------------------------------------------------------------------------------|
| 1  | PECTO DRILL, syrup, 200 ml, 5909990498017                                           | BISOCARD, film-coated tablets, 30 tablets, 5909990804511                        |
| 2  | KALIPOZ PROLONGATUM, prolonged-release tablets, 60 tablets , 5909990257539          | DIURESIN SR, film-coated prolonged-release tablets, 30 tablets , 5909990975815  |
| 3  | PECTO DRILL, lozenges, 20 lozenges, 5909990497911                                   | KALIPOZ PROLONGATUM, prolonged-release tablets, 60 tablets , 5909990257539      |
| 4  | BISOCARD, film-coated tablets, 30 tablets, 5909990804511                            | NEDAL, tablets, 28 tablets , 5909990642809                                      |
| 5  | NEBILET, tablets, 28 tablets , 5909990670185                                        | MILURIT, tablets, 50 tablets, 5909990163212                                     |
| 6  | MILURIT, tablets, 50 tablets, 5909990163212                                         | FUROSEMIDUM POLFARMEX, tablets, 30 tablets , 5909990223794                      |
| 7  | NIMESIL, granules for oral suspension, 30 sachet a 2g, 5909991040338                | TERTENSIF SR, film-coated prolonged-release tablets, 30 tablets , 5909990738212 |
| 8  | DICORTINEFF, ear/eye drops, suspension, 5 ml , 5909990221868                        | TRITACE 5, tablets, 28 tablets, 5909990478316                                   |
| 9  | ASECURIN, capsules, 20 capsules, 5902020845140                                      | PRESTARIUM 5 MG, film-coated tablets, 30 tablets, 5909990337774                 |
| 10 | FUROSEMIDUM POLFARMEX, tablets, 30 tablets , 5909990223794                          | POLPRIL, tablets, 28 tablets, 5909990924646                                     |
| 11 | BERODUAL, nebuliser solution, 20 ml , 5909990101917                                 | AMLOZEK, tablets, 30 tablets , 5909990799718                                    |
| 12 | LEVOPRONT, syrup, 120 ml , 5909990910823                                            | INDAPEN SR, prolonged-release tablets, 30 tablets , 5909990665907               |
| 13 | CONTROLOC 20, gastro-resistant tablets, 28 tablets , 5909990478774                  | METOCARD ZK, prolonged-release tablets, 28 tablets , 5909990697229              |
| 14 | ERDOMED, capsules, 20 capsules , 5909990041824                                      | GLUCOPHAGE XR, prolonged-release tablets, 60 tablets, 5909990864461             |
| 15 | VENTOLIN, pressurised inhalation, suspension, 200 metered actuations, 5909990442010 | CONTOUR PLUS, test strips, 50 pieces, 5016003763403                             |
| 16 | DIURESIN SR, film-coated prolonged-release tablets, 30 tablets , 5909990975815      | CONTROLOC 20, gastro-resistant tablets, 28 tablets , 5909990478774              |
| 17 | ENTEROL 250, capsules, 10 capsules, 5909990748419                                   | BISOCARD, film-coated tablets, 30 tablets , 5909990673360                       |
| 18 | TERTENSIF SR, film-coated prolonged-release tablets, 30 tablets , 5909990738212     | ATORIS, film-coated tablets, 30 tablets , 5909990991914                         |
| 19 | GLIMBAX, mouthwash and gargle, 200 ml, 5909990645022                                | FUROSEMIDUM POLPHARMA, tablets, 30 tablets, 5909990135028                       |
| 20 | NEDAL, tablets, 28 tablets , 5909990642809                                          | TRITACE 10, tablets, 28 tablets , 5909990916016                                 |
| 21 | ERDOMED, capsules, 10 capsules, 5909990041800                                       | ATORVASTEROL, film-coated tablets, 30 tablets, 5909990077939                    |

|    |                                                                       |                                                                 |
|----|-----------------------------------------------------------------------|-----------------------------------------------------------------|
| 22 | DORETA, film-coated tablets, 60 tablets , 5909990735167               | DIAPREL MR, modified-release tablets, 30 tablets, 5909990774746 |
| 23 | INDAPEN SR, prolonged-release tablets, 30 tablets , 5909990665907     | XARELTO, film-coated tablets, 28 tablets, 5909990910724         |
| 24 | METMIN, nasal spray, suspension, 140 actuations (18 g), 5909991141004 | LETROX 50, tablets, 50 tablets, 5909990374014                   |
| 25 | NEUROVIT, film-coated tablets, 20 tablets , 5909990761500             | NEBILENIN, tablets, 28 tablets, 5909990689774                   |
| 26 | ACARD, gastro-resistant tablets, 30 tablets , 5909990672516           | BISORATIO 5, tablets, 30 tablets , 5909991015015                |
| 27 | AMOKSIKLAV, film-coated tablets, 14 tablets , 5909990411115           | SPIRONOL, tablets, 100 tablets, 5909990110223                   |
| 28 | NEBBUD, nebuliser suspension, 20 ampules a 2ml, 5909991005696         | NEBICARD, tablets, 28 tablets, 5909990685189                    |
| 29 | AMLOZEK, tablets, 30 tablets , 5909990799718                          | ROSWERA, film-coated tablets, 28 tablets, 5909990895106         |
| 30 | MYDOCALM FORTE, film-coated tablets, 30 tablets , 5909990228010       | DIUVER, tablets, 30 tablets , 5909990422883                     |
| 31 | STRUCTUM, capsules, 60 capsules, 5909991082215                        | AXTIL, tablets, 30 tablets , 5909990337972                      |
| 32 | POLPRIL, tablets, 28 tablets, 5909990924646                           | LETROX 100, tablets, 50 tablets, 5909990168910                  |
| 33 | CONTOUR PLUS, test strips, 50 pieces, 5016003763403                   | LETROX 75, tablets, 50 tablets, 5909991107260                   |
| 34 | ATORIS, film-coated tablets, 30 tablets , 5909990991914               | METOCARD, tablets, 30 tablets , 5909990034420                   |
| 35 | SPIRONOL, tablets, 100 tablets, 5909990110223                         | POLPRIL, capsules hard, 28 capsules , 5909990694631             |
| 36 | TRITACE 5, tablets, 28 tablets, 5909990478316                         | IXELL, test strips, 50 pieces, 5908222562632                    |
| 37 | ACCU-CHEK PERFORMA, test strips, 50 pieces, 4015630980987             | POLFENON, film-coated tablets, 20 tablets, 5909990034123        |
| 38 | FANIPOS, nasal spray, suspension, 120 actuations, 5909990570720       | MILURIT, tablets, 30 tablets, 5909990414819                     |
| 39 | PRESTARIUM 5 MG, film-coated tablets, 30 tablets, 5909990337774       | POLPRIL, tablets, 28 tablets, 5909990924608                     |
| 40 | ARGENTIN - T SPRAY D/GARDA, -, 20 ml, 5902768521054                   | METIZOL, tablets, 50 tablets, 5909990231911                     |
| 41 | SUMAMED, film-coated tablets, 3 tablets, 5909990742417                | TORAMIDE, tablets, 30 tablets , 5909991161910                   |
| 42 | CIPRONEX, film-coated tablets, 10 tablets , 5909990334964             | LIPANTHYL 267 M, capsules, 30 capsules, 5909990492817           |
| 43 | ROSWERA, film-coated tablets, 28 tablets, 5909990895106               | TORAMIDE, tablets, 30 tablets , 5909991162016                   |
| 44 | KETONAL FORTE, film-coated tablets, 30 tablets, 5909990046485         | PRIMACOR, film-coated tablets, 28 tablets , 5909990928521       |
| 45 | CLATRA, tablets, 30 tablets, 5909990840335                            | ACCU-CHEK PERFORMA, test strips, 50 pieces, 4015630980987       |
| 46 | BISORATIO 5, tablets, 30 tablets , 5909991015015                      | ZAHRON, film-coated tablets, 28 tablets, 5909990802623          |
| 47 | GLUCOPHAGE XR, prolonged-release tablets, 60 tablets, 5909990864461   | ZAHRON, film-coated tablets, 28 tablets, 5909990802562          |
| 48 | DICLODUO, modified-release capsules, 30 capsules , 5909990752010      | DORETA, film-coated tablets, 60 tablets, 5909990735167          |
| 49 | DUOMOX, tablets, 20 tablets, 5909990063413                            | POLPRIL, tablets, 28 tablets, 5909990924653                     |
| 50 | NO-SPA FORTE, tablets, 20 tablets, 5909990865321                      | METFORMAX 500, tablets, 60 tablets, 5909990935253               |
| 51 | BISOCARD, film-coated tablets, 30 tablets , 5909990673360             | AMLOPIN 5 MG, tablets, 30 tablets , 5909990048939               |

|    |                                                                    |                                                                            |
|----|--------------------------------------------------------------------|----------------------------------------------------------------------------|
| 52 | DIUVER, tablets, 30 tablets , 5909990422883                        | DORETA, film-coated tablets, 60 tablets, 5909990936595                     |
| 53 | MILURIT, tablets, 30 tablets, 5909990414819                        | POLPRAZOL, gastro-resistant capsules, hard, 28 capsules , 5909990772667    |
| 54 | CONTROLOC 40, gastro-resistant tablets, 28 tablets , 5909990689859 | TORVALIPIN, film-coated tablets, 30 tablets , 5909990053230                |
| 55 | FUROSEMIDUM POLPHARMA, tablets, 30 tablets, 5909990135028          | ROMAZIC, film-coated tablets, 30 tablets, 5909990919604                    |
| 56 | FLUIMUCIL, effervescent tablets, 10 tablets, 5909997199122         | KETREL, film-coated tablets, 30 tablets , 5909990430840                    |
| 57 | DEVIKAP, oral solution, 10 ml, 5909990260218                       | METOCARD ZK, prolonged-release tablets, 28 tablets , 5909990697205         |
| 58 | NASEN, film-coated tablets, 20 tablets , 5909991084431             | POLPRIL, capsules hard, 28 capsules , 5909990694655                        |
| 59 | KLABAX, film-coated tablets, 14 tablets , 5909990045532            | ATORIS, film-coated tablets, 30 tablets , 5909990991815                    |
| 60 | AMOTAKS, tablets, 16 tablets , 5909990691319                       | VIVACE 10 MG, tablets, 30 tablets , 5909990610532                          |
| 61 | NEBILENIN, tablets, 28 tablets, 5909990689774                      | CONCOR COR 2,5, film-coated tablets, 28 tablets , 5909990859016            |
| 62 | ERDOMED, powder for oral suspension, 100 ml , 5909990052929        | NOLIPREL FORTE, film-coated tablets, 30 tablets , 5909990055029            |
| 63 | KETREL, film-coated tablets, 30 tablets , 5909990430840            | EUTHYROX N 75, tablets, 100 tablets , 5909991051327                        |
| 64 | NEBBUD, nebuliser suspension, 20 ampules a 2ml, 5909991005733      | ACARD, gastro-resistant tablets, 30 tablets , 5909990672516                |
| 65 | RUPAFIN 10, tablets, 30 tablets , 5909990083282                    | SOBYCOR, film-coated tablets, 30 tablets, 5909991097400                    |
| 66 | FLEGAMINA BABY, oral drops, 30 ml, 5909990114214                   | ROSWERA, film-coated tablets, 28 tablets, 5909990895250                    |
| 67 | ROSWERA, film-coated tablets, 28 tablets, 5909990895250            | ACENOCUMAROL WZF, tablets, 60 tablets, 5909990055715                       |
| 68 | ACENOCUMAROL WZF, tablets, 60 tablets, 5909990055715               | LIPANTHYL SUPRA 160, film-coated tablets, 30 tablets , 5909990903917       |
| 69 | BIOFENAC, film-coated tablets, 20 tablets, 5909990881307           | XARELTO, film-coated tablets, 28 tablets, 5909990910656                    |
| 70 | CLATRA, tablets, 10 tablets, 5909990840298                         | POLSART, tablets, 28 tablets, 5909990936700                                |
| 71 | CYCLO 3 FORT, capsules hard, 30 capsules, 5909990884315            | ZOFENIL 30, film-coated tablets, 28 tablets, 5909991129439                 |
| 72 | DORETA, film-coated tablets, 60 tablets, 5909990936595             | KALIPOZ PROLONGATUM, prolonged-release tablets, 30 tablets , 5909990257515 |
| 73 | KETONAL, żel, 100 g , 5909990634033                                | EUTHYROX N 50, tablets, 100 tablets , 5909991051228                        |
| 74 | BACLOFEN POLPHARMA, tablets, 50 tablets, 5909990033713             | TRITACE 2,5, tablets, 28 tablets , 5909990478217                           |
| 75 | DIPHERGAN, tablets drażowane, 20 tablets, 5909990228317            | ACTELSAR, tablets, 28 tablets, 5909990891863                               |
| 76 | IBUPROFEN -PABI, tablets drażowane, 60 tablets , 5909990132928     | AXTIL, tablets, 30 tablets , 5909990337989                                 |
| 77 | ZINNAT, film-coated tablets, 14 tablets, 5909990083435             | NIMESIL, granules for oral suspension, 30 sachet a 2g, 5909991040338       |
| 78 | OPOKAN-KETO, żel, 100 g , 5906071004051                            | CONTROLOC 40, gastro-resistant tablets, 28 tablets , 5909990689859         |
| 79 | TRITACE 10, tablets, 28 tablets , 5909990916016                    | EBIVOL, tablets, 30 tablets , 5909990662425                                |
| 80 | XARELTO, film-coated tablets, 28 tablets, 5909990910724            | SIMVASTEROL, film-coated tablets, 28 tablets , 5909990927715               |
| 81 | ZAHRON, film-coated tablets, 28 tablets, 5909990802623             | ROSWERA, film-coated tablets, 28 tablets, 5909990895380                    |

|     |                                                                                |                                                                                     |
|-----|--------------------------------------------------------------------------------|-------------------------------------------------------------------------------------|
| 82  | KALIPOZ PROLONGATUM, prolonged-release tablets, 30 tablets , 5909990257515     | PRESTARIUM 10 MG, film-coated tablets, 30 tablets, 5909990336081                    |
| 83  | HITAXA, orodispersible tablets, 30 tablets, 5909990981373                      | AVEDOL, film-coated tablets, 30 tablets , 5909990074051                             |
| 84  | LETROX 100, tablets, 50 tablets, 5909990168910                                 | TRIMEDUCTAN MR, film-coated modified-release tablets, 60 tablets , 5909991151812    |
| 85  | TORAMIDE, tablets, 30 tablets , 5909991162016                                  | KETONAL FORTE, film-coated tablets, 30 tablets, 5909990046485                       |
| 86  | OLFEN 75 SR, film-coated prolonged-release tablets, 30 tablets , 5909990974122 | AMLOZEK, tablets, 30 tablets , 5909990799817                                        |
| 87  | TORAMIDE, tablets, 30 tablets , 5909991161910                                  | IPP 20, gastro-resistant tablets, 28 tablets , 5909990085033                        |
| 88  | MILGAMMA N, solution for injection, 5 ampules, 5909991020415                   | ATORVOX, film-coated tablets, 30 tablets , 5909990573530                            |
| 89  | METOCARD, tablets, 30 tablets , 5909990034420                                  | VENTOLIN, pressurised inhalation, suspension, 200 metered actuations, 5909990442010 |
| 90  | PIMAFUCORT, cream, 15 g , 5909990191710                                        | PREDUCTAL MR, modified-release tablets, 60 tablets , 5909990846115                  |
| 91  | BUDERHIN, nasal spray, suspension, 1 poj.a 200actuations, 5909990332311        | EUTHYROX N 75, tablets, 50 tablets, 5909991051310                                   |
| 92  | POLPRAZOL, gastro-resistant capsules, hard, 28 capsules , 5909990772667        | CAPTOPRIL, tablets, 30 tablets, 5909990044030                                       |
| 93  | POLFENON, film-coated tablets, 20 tablets, 5909990034123                       | CONCOR COR 1,25, film-coated tablets, 28 tablets , 5909990858910                    |
| 94  | POLPRIL, tablets, 28 tablets, 5909990924608                                    | DIAPREL MR, modified-release tablets, 60 tablets , 5909990443017                    |
| 95  | IPP 20, gastro-resistant tablets, 28 tablets , 5909990085033                   | SPIRONOL, tablets, 20 tablets (1x20), 5909990110216                                 |
| 96  | LETROX 75, tablets, 50 tablets, 5909991107260                                  | EFFOX LONG 50, prolonged-release tablets, 30 tablets, 5909990368624                 |
| 97  | ATORVASTEROL, film-coated tablets, 30 tablets, 5909990077939                   | ZARANTA, film-coated tablets, 28 tablets , 5909990777785                            |
| 98  | DIAPREL MR, modified-release tablets, 30 tablets, 5909990774746                | INDIX COMBI, film-coated tablets, 30 tablets, 5909991050344                         |
| 99  | CONTIX, gastro-resistant tablets, 14 tablets , 5909991128814                   | LECALPIN, film-coated tablets, 30 tablets, 5909990774555                            |
| 100 | DEXILANT, modified-release capsules hard, 28 capsules, 5909991096748           | INDIX SR, prolonged-release tablets, 30 tablets , 5909991025014                     |
| 101 | BIOTYK, capsules, 10 capsules                                                  | NOLPAZA 20, gastro-resistant tablets, 90 tablets, 5909990845521                     |
| 102 | HITAXA, oral solution, 150 ml , 5909990981458                                  | INS. NOVORAPID PENFILL, solution for injection, 5 wkł.a 3ml, 5909990451814          |
| 103 | METOCARD ZK, prolonged-release tablets, 28 tablets , 5909990697229             | ATROX 20, film-coated tablets, 30 tablets , 5909991124717                           |
| 104 | LETROX 50, tablets, 50 tablets, 5909990374014                                  | VIVACE 5 MG, tablets, 30 tablets , 5909990610495                                    |
| 105 | TELFEXO 180, film-coated tablets, 20 tablets , 5909990081837                   | FINASTER, film-coated tablets, 30 tablets , 5909991151218                           |

|     |                                                                          |                                                                        |
|-----|--------------------------------------------------------------------------|------------------------------------------------------------------------|
| 106 | KALDYUM, prolonged-release capsules hard, 100 capsules, 5909990822126    | TRIFAS 10, tablets, 30 tablets, 5909990471324                          |
| 107 | TRIDERM, ointment, 15 g , 5909990401925                                  | SETAL MR, modified-release tablets, 60 tablets , 5909990646746         |
| 108 | CAPTOPRIL JELFA, tablets, 30 tablets , 5909990673384                     | BETO 50 ZK, prolonged-release tablets, 28 tablets , 5909990220809      |
| 109 | TAROMENTIN, film-coated tablets, 14 tablets , 5909991087715              | METFORMAX 500, tablets, 30 tablets , 5909990126316                     |
| 110 | RAMOCLAV, film-coated tablets, 14 tablets, 5909991042073                 | ATORIS, film-coated tablets, 30 tablets, 5909990623464                 |
| 111 | AXTIL, tablets, 30 tablets , 5909990337972                               | GLUCOPHAGE 500 MG, film-coated tablets, 30 tablets, 5909990789276      |
| 112 | LACIDAR, tablets, 20 tablets, 5907670697033                              | MESOPRAL, gastro-resistant capsules, hard, 28 capsules , 5909990876280 |
| 113 | FURAGINUM TEVA, tablets, 30 tablets, 5909990988235                       | NONPRES, film-coated tablets, 30 tablets, 5909991014728                |
| 114 | DICLOBERL RETARD, prolonged-release capsules, 20 capsules, 5909990492213 | LIPANTHYL SUPRA 215, film-coated tablets, 30 tablets , 5909990431342   |
| 115 | NOLPAZA 20, gastro-resistant tablets, 28 tablets , 5909990075003         | BETALOC ZOK 50, prolonged-release tablets, 28 tablets , 5909990738632  |
| 116 | ATORIS, film-coated tablets, 30 tablets , 5909990991815                  | NOLPAZA 20, gastro-resistant tablets, 56 tablets , 5909990075041       |
| 117 | MESOPRAL, gastro-resistant capsules, hard, 28 capsules , 5909990876280   | STRUCTUM, capsules, 60 capsules, 5909991082215                         |
| 118 | POLPRIL, capsules hard, 28 capsules , 5909990694631                      | EUTHYROX N 25, tablets, 100 tablets , 5909991051129                    |
| 119 | MACROMAX, film-coated tablets, 3 tablets , 5909990713608                 | RANIGAST, film-coated tablets, 60 tablets , 5909990206728              |
| 120 | NEBBUD (NEBUCORT), nebuliser suspension, 10 ampules a 2ml, 5909991228859 | RANLOSIN, prolonged-release capsules, 30 capsules, 5909990048007       |
| 121 | ZAHRON, film-coated tablets, 28 tablets, 5909990802562                   | LOKREN 20, film-coated tablets, 28 tablets , 5909990037414             |
| 122 | CONTIX, gastro-resistant tablets, 28 tablets , 5909991128838             | VALSACOR 80, film-coated tablets, 28 tablets , 5909990074945           |
| 123 | MUCOSOLVAN INHALACJE, nebuliser solution, 100 ml, 5909990102518          | SIOFOR 1000, film-coated tablets, 90 tablets, 5909990221004            |
| 124 | MILGAMMA 100, coated tablets, 30 tablets, 5909991080419                  | ZAHRON, film-coated tablets, 28 tablets, 5909990802685                 |
| 125 | ZYRTEC, oral drops, solution, 20 ml, 5909990184736                       | BISOCARD, film-coated tablets, 60 tablets, 5909990804528               |
| 126 | RANIGAST, film-coated tablets, 60 tablets , 5909990206728                | TAMISPRAS, prolonged-release tablets, 30 tablets, 5909990980451        |
| 127 | DEXILANT, modified-release capsules hard, 28 capsules, 5909991096762     | ACTELSAR HCT, tablets, 28 tablets, 5909991056773                       |
| 128 | FLOXAL, eye drops, solution, 5 ml , 5909990411610                        | DIAGNOSTIC GOLD STRIP, test strips, 50 pieces, 5906881862681           |
| 129 | AUGMENTIN, film-coated tablets, 14 tablets , 5909990717521               | TULIP, film-coated tablets, 30 tablets , 5909990998913                 |
| 130 | POLPRIL, tablets, 28 tablets, 5909990924653                              | VALSACOR 160, film-coated tablets, 28 tablets , 5909990074969          |
| 131 | TRILAC, capsules hard, 20 capsules, 5909990701919                        | NITRENDYPINA EGIS, tablets, 60 tablets, 5909990694785                  |

|     |                                                                        |                                                                       |
|-----|------------------------------------------------------------------------|-----------------------------------------------------------------------|
| 132 | PRAMOLAN, film-coated tablets, 20 tablets, 5909990205813               | ACCU-CHEK ACTIVE, test strips, 50 pieces, 4015630056316               |
| 133 | POLTRAM COMBO, film-coated tablets, 60 tablets, 5909990841004          | KALDYUM, prolonged-release capsules hard, 50 capsules, 5909990822119  |
| 134 | TRITTICO CR, prolonged-release tablets, 30 tablets , 5909990918621     | BIOSOTAL 40, tablets, 60 tablets , 5909990365715                      |
| 135 | EMANERA, gastro-resistant capsules, hard, 28 capsules, 5909990926497   | BIBLOC, film-coated tablets, 30 tablets, 5909990694105                |
| 136 | OSPAMOX, film-coated tablets, 16 tablets, 5909990293322                | AMLOPIN 10 MG, tablets, 30 tablets , 5909990048977                    |
| 137 | DIGOXIN TEVA, tablets, 30 tablets , 5909990012114                      | BIOPRAZOL, capsules hard, 28 capsules, 5909990880225                  |
| 138 | ACARD, gastro-resistant tablets, 60 tablets , 5909990672523            | MESOPRAL, gastro-resistant capsules, hard, 28 capsules, 5909990876778 |
| 139 | XARELTO, film-coated tablets, 28 tablets, 5909990910656                | LACIPIL, film-coated tablets, 28 tablets , 5909990650620              |
| 140 | IXELL, test strips, 50 pieces, 5908222562632                           | METFORMAX 850, tablets, 60 tablets, 5909990935260                     |
| 141 | METFORMAX 500, tablets, 60 tablets, 5909990935253                      | EUTHYROX N 88 MCG, tablets, 50 tablets, 5909990718986                 |
| 142 | SINUPRET, coated tablets, 50 tablets, 5909990763818                    | PRENESSA, tablets, 30 tablets , 5909990569311                         |
| 143 | LIPANTHYL SUPRA 160, film-coated tablets, 30 tablets , 5909990903917   | WARFIN, tablets, 100 tablets, 5909990622382                           |
| 144 | CONCOR COR 2,5, film-coated tablets, 28 tablets , 5909990859016        | HYDROXYZINUM VP, film-coated tablets, 30 tablets , 5909990188819      |
| 145 | NEBICARD, tablets, 28 tablets, 5909990685189                           | NOLPAZA 20, gastro-resistant tablets, 28 tablets , 5909990075003      |
| 146 | BIORACEF, film-coated tablets, 14 tablets , 5909990063703              | AXTIL, tablets, 30 tablets , 5909990337958                            |
| 147 | ZYRTEC, film-coated tablets, 30 tablets , 5909990184637                | ACTELSAR HCT, tablets, 28 tablets, 5909991056247                      |
| 148 | SOBYCOR, film-coated tablets, 30 tablets, 5909991097400                | VESSEL DUE F, soft capsules, 50 capsules, 5909990039616               |
| 149 | LACIPIL, film-coated tablets, 28 tablets , 5909990650620               | GLIBETIC 4MG, tablets, 30 tablets , 5909991097318                     |
| 150 | METIZOL, tablets, 50 tablets, 5909990231911                            | TRIFAS COR, tablets, 30 tablets, 5909990471225                        |
| 151 | AXTIL, tablets, 30 tablets , 5909990337989                             | AVEDOL, film-coated tablets, 30 tablets , 5909990074099               |
| 152 | POLSART, tablets, 28 tablets, 5909990936700                            | HEPAREGEN, tablets, 100 tablets, 5909990029327                        |
| 153 | TOLPERIS VP, film-coated tablets, 30 tablets , 5909990959716           | BETALOC ZOK 25, prolonged-release tablets, 28 tablets , 5909990916818 |
| 154 | DICOFLOL 60, capsules, 10 capsules, 8033300190043                      | TELMIZEK, tablets, 28 tablets, 5909990902095                          |
| 155 | LIPANTHYL SUPRA 215, film-coated tablets, 30 tablets , 5909990431342   | EUTHYROX N 50, tablets, 50 tablets, 5909991051211                     |
| 156 | AULIN, granules for oral suspension, 30 sachets a 2g, 5909990411436    | CLATRA, tablets, 30 tablets, 5909990840335                            |
| 157 | MESOPRAL, gastro-resistant capsules, hard, 28 capsules , 5909990876778 | POLSART, tablets, 28 tablets, 5909990936670                           |
| 158 | EBILFUMIN, capsules hard, 10 capsules                                  | TIALORID MITE, tablets, 50 tablets, 5909990373819                     |
| 159 | ROMAZIC, film-coated tablets, 30 tablets, 5909990919604                | POLTRAM COMBO, film-coated tablets, 60 tablets, 5909990841004         |
| 160 | AUGMENTIN, film-coated tablets, 14 tablets, 5909997198385              | EUTHYROX N 100, tablets, 100 tablets , 5909991051426                  |
| 161 | CAPTOPRIL, tablets, 30 tablets, 5909991160913                          | ATORVASTEROL, film-coated tablets, 30 tablets, 5909990077847          |

|     |                                                                                |                                                                                |
|-----|--------------------------------------------------------------------------------|--------------------------------------------------------------------------------|
| 162 | IBUPROM ZATOKI, film-coated tablets, 12 tablets , 5909990965021                | BETO 50 ZK, prolonged-release tablets, 30 tablets, 5909997198354               |
| 163 | SIMVASTEROL, film-coated tablets, 28 tablets , 5909990927715                   | CONTIX, gastro-resistant tablets, 28 tablets , 5909991128838                   |
| 164 | DEFLEGMIN, prolonged-release capsules, 10 capsules , 5909990369218             | ALDAN, tablets, 30 tablets , 5909991008635                                     |
| 165 | SIRDALUD, tablets, 30 tablets, 5909990671311                                   | VICEBROL FORTE, tablets, 90 tablets, 5909990692491                             |
| 166 | ZINNAT, granules for oral suspension, 50 ml (39,98 g granulatu), 5909990468812 | TOLURA, tablets, 28 tablets , 5909997077673                                    |
| 167 | LEVOPRONT, syrup, 200 ml , 5909990669905                                       | CAVINTON FORTE, tablets, 90 tablets, 5909991028923                             |
| 168 | AZYCYNA, film-coated tablets, 3 tablets, 5909991098520                         | DIUVER, tablets, 30 tablets , 5909991003821                                    |
| 169 | METOCARD ZK, prolonged-release tablets, 28 tablets , 5909990697205             | ACTELSAR, tablets, 28 tablets, 5909990891832                                   |
| 170 | DALACIN C, capsules, 16 capsules , 5909990306435                               | PROTEVASC SR, film-coated prolonged-release tablets, 60 tablets, 5909990919680 |
| 171 | PIMAFUCORT, ointment, 15 g , 5909990210015                                     | EMANERA, gastro-resistant capsules, hard, 28 capsules, 5909990926497           |
| 172 | INDIX SR, prolonged-release tablets, 30 tablets , 5909991025014                | NONPRES, film-coated tablets, 30 tablets, 5909991014759                        |
| 173 | HYDROXYZINUM VP, film-coated tablets, 30 tablets , 5909990188819               | EUTHYROX N 25, tablets, 50 tablets, 5909991051112                              |
| 174 | POLTRAM COMBO, film-coated tablets, 30 tablets, 5909990840991                  | ACARD, gastro-resistant tablets, 60 tablets , 5909990672523                    |
| 175 | AMOKSIKLAV, powder for oral suspension, 70 ml (17,5 g), 5909990894826          | ATORVASTEROL, film-coated tablets, 30 tablets, 5909990078028                   |
| 176 | NOLPAZA 20, gastro-resistant tablets, 90 tablets, 5909990845521                | AREPLEX, film-coated tablets, 28 tablets , 5909991167011                       |
| 177 | SPIRONOL, tablets, 20 tablets (1x20), 5909990110216                            | JARDIANCE, film-coated tablets, 30 tablets , 5909991138516                     |
| 178 | NEBBUD, nebuliser suspension, 10 ampules a 2ml, 5909991228842                  | KALDYUM, prolonged-release capsules hard, 100 capsules, 5909990822126          |
| 179 | EUTHYROX N 50, tablets, 100 tablets , 5909991051228                            | NOLIPREL BI-FORTE, film-coated tablets, 30 tablets, 5909990707782              |
| 180 | TRITACE 2,5, tablets, 28 tablets , 5909990478217                               | EUTHYROX N 125, tablets, 100 tablets , 5909991051525                           |
| 181 | ACLEXA, capsules hard, 30 capsules, 5909991108373                              | ESPIRO, film-coated tablets, 30 tablets, 5909990971473                         |
| 182 | AMLOZEK, tablets, 30 tablets , 5909990799817                                   | DIURED, tablets, 30 tablets , 5909990734504                                    |
| 183 | SORBIFER DURULES, prolonged-release tablets, 50 tablets, 5909990864553         | TORAMIDE, tablets, 30 tablets , 5909991162115                                  |
| 184 | NEUROVIT, film-coated tablets, 100 tablets, 5909990761531                      | HITAXA, orodispersible tablets, 30 tablets, 5909990981373                      |
| 185 | HYDROXYZINUM VP, film-coated tablets, 30 tablets, 5909990188710                | ABRA, test strips, 50 szt., 5907581253625                                      |
| 186 | EMANERA, gastro-resistant capsules, hard, 28 capsules, 5909990926534           | ROMAZIC, film-coated tablets, 30 tablets, 5909990919659                        |
| 187 | PREDUCTAL MR, modified-release tablets, 60 tablets , 5909990846115             | BIBLOC, film-coated tablets, 30 tablets, 5909990694167                         |
| 188 | CITRAFLEET, powder for oral solution, 2 sachets, 5909991076245                 | LERCAN, film-coated tablets, 28 tablets, 5391519921098                         |
| 189 | ENTEROMAX, capsules, 10 capsules, 5907698302780                                | PRADAXA, capsules hard, 60 capsules , 5909990887484                            |

|     |                                                                                                         |                                                                                        |
|-----|---------------------------------------------------------------------------------------------------------|----------------------------------------------------------------------------------------|
| 190 | AMLOPIN 5 MG, tablets, 30 tablets , 5909990048939                                                       | NITRENDYPINA EGIS, tablets, 60 tablets, 5909990694754                                  |
| 191 | ATROVENT N, pressurised inhalation, solution, 10 ml (200 actuations), 5909990999019                     | TRITTICO CR, prolonged-release tablets, 30 tablets , 5909990918621                     |
| 192 | FERVEX, granules for oral solution, 8 sachets, 5909990363117                                            | DEVIKAP, oral solution, 10 ml, 5909990260218                                           |
| 193 | FURAGINUM ADAMED, tablets, 30 tablets, 5909990357215                                                    | TOLURA, tablets, 28 tablets , 5909997077604                                            |
| 194 | CERUTIN, film-coated tablets, 100 tablets , 5909990882823                                               | COSOPT, eye drops, solution, 1 but.a 5ml, 5909990442423                                |
| 195 | GARDVIT A+E SPRAY NA SUCHE GARDŁO, spray, 30 ml, 5901968037013                                          | SIOFOR 850, film-coated tablets, 120 tablets, 5909990457335                            |
| 196 | PRIMACOR, film-coated tablets, 28 tablets , 5909990928521                                               | AMLOPIN, tablets, 30 tablets, 5909991337742                                            |
| 197 | EUTHYROX N 75, tablets, 100 tablets , 5909991051327                                                     | POLSART PLUS, tablets, 28 tablets, 5909991079598                                       |
| 198 | HEPAREGEN, tablets, 100 tablets, 5909990029327                                                          | MEMOTROPIL, film-coated tablets, 60 tablets , 5909990873746                            |
| 199 | POLPRIL, capsules hard, 28 capsules , 5909990694655                                                     | DICLOBERL RETARD, prolonged-release capsules, 20 capsules, 5909990492213               |
| 200 | MOMESTER, nasal spray, suspension, 1 but.a 140 actuations (18 g), 5909991195366                         | METFORMAX SR 500, prolonged-release tablets, 60 tablets, 5909990933167                 |
| 201 | NALGESIN FORTE, film-coated tablets, 30 tablets, 5909991023805                                          | ROMAZIC, film-coated tablets, 30 tablets, 5909990919574                                |
| 202 | OLFEN UNO, modified-release tablets, 30 tablets , 5909990457120                                         | GLUCOPHAGE XR, prolonged-release tablets, 60 tablets, 5909990213436                    |
| 203 | SKUDEXA, film-coated tablets, 20 tablets, 5909991274580                                                 | TELMIZEK, tablets, 28 tablets, 5909990902002                                           |
| 204 | PRAMOLAN, film-coated tablets, 56 tablets, 5909991228439                                                | DEPAKINE CHRONO 500, film-coated prolonged-release tablets, 30 tablets , 5909990694426 |
| 205 | METFORMAX SR 500, prolonged-release tablets, 30 tablets , 5909990652112                                 | HYDROXYZINUM VP, film-coated tablets, 30 tablets, 5909990188710                        |
| 206 | BUTAPIRAZOL, ointment, 30 g , 5909990142910                                                             | CONTOUR TS, test strips, 50 pieces, 5016003183904                                      |
| 207 | AGLAN 15, tablets, 30 tablets, 5909990610006                                                            | GLUCOPHAGE XR, prolonged-release tablets, 30 tablets , 5909990213429                   |
| 208 | LOKREN 20, film-coated tablets, 28 tablets , 5909990037414                                              | BIOSOTAL 80, tablets, 30 tablets , 5909990365616                                       |
| 209 | POLSART, tablets, 28 tablets, 5909990936670                                                             | BISOCARD, film-coated tablets, 30 tablets, 5909990804412                               |
| 210 | LIPANTHYL 267 M, capsules, 30 capsules, 5909990492817                                                   | ZOCOR 20, film-coated tablets, 28 tablets , 5909990366026                              |
| 211 | FINASTER, film-coated tablets, 30 tablets , 5909991151218                                               | RUPAFIN, oral solution, 120 ml , 5909990991921                                         |
| 212 | NASONEX, nasal spray, suspension, 18 g (140 actuations), 5909990732395                                  | DOXANORM, tablets, 30 tablets , 5909990854516                                          |
| 213 | CEROXIM, film-coated tablets, 14 tablets, 5909991263409                                                 |                                                                                        |
| 214 | MIFLONIDE BREEZHALER (MIFLONIDE), inhalation powder, hard capsules, 60 capsules (+ inh.), 5909990926213 |                                                                                        |



|     |                                                                                  |  |
|-----|----------------------------------------------------------------------------------|--|
| 215 | BIODACYNA OPHTHALMICUM 0,3%, eye drops, solution, 5 ml, 5909990129317            |  |
| 216 | SETAL MR, modified-release tablets, 60 tablets , 5909990646746                   |  |
| 217 | TIALORID MITE, tablets, 50 tablets, 5909990373819                                |  |
| 218 | NITRENDYPINA EGIS, tablets, 60 tablets, 5909990694785                            |  |
| 219 | EUTHYROX N 75, tablets, 50 tablets, 5909991051310                                |  |
| 220 | ATORIS, film-coated tablets, 30 tablets, 5909990623464                           |  |
| 221 | KETOPROFENUM FASTUM, žel, 100 g , 5909990569229                                  |  |
| 222 | NASOMETIN, nasal spray, suspension, 1 but.a 140actuactions (18 g), 5909991031275 |  |
| 223 | DIUVER, tablets, 30 tablets , 5909991003821                                      |  |
| 224 | AMLOPIN, tablets, 30 tablets, 5909991337742                                      |  |
| 225 | NUROFEN, film-coated tablets, 12 tablets , 5909990706822                         |  |
| 226 | ROSWERA, film-coated tablets, 28 tablets, 5909990895380                          |  |
| 227 | ATROX 20, film-coated tablets, 30 tablets , 5909991124717                        |  |
| 228 | MYDOCALM, film-coated tablets, 30 tablets , 5909990227914                        |  |
| 229 | ELOCOM, ointment, 15 g, 5909990278916                                            |  |
| 230 | BUDIXON NEB, nebuliser suspension, 10 poj.a 2ml, 5906414002782                   |  |
| 231 | VALSACOR 160, film-coated tablets, 28 tablets , 5909990074969                    |  |
| 232 | EBIVOL, tablets, 30 tablets , 5909990662425                                      |  |
| 233 | MOVALIS, tablets, 20 tablets, 5909990464418                                      |  |
| 234 | DIAPREL MR, modified-release tablets, 60 tablets , 5909990443017                 |  |
| 235 | BIBLOC, film-coated tablets, 30 tablets, 5909990694105                           |  |
| 236 | OROFAR, tablets do ssania, 24 tablets, 5909990933112                             |  |
| 237 | EUTHYROX N 25, tablets, 50 tablets, 5909991051112                                |  |
| 238 | GLUCOPHAGE XR, prolonged-release tablets, 30 tablets , 5909990213429             |  |
| 239 | HEVIRAN, film-coated tablets, 30 tablets , 5909990840229                         |  |
| 240 | LAKCID FORTE, capsules hard, 10 capsules, 5909991067830                          |  |
| 241 | BETALOC ZOK 25, prolonged-release tablets, 28 tablets , 5909990916818            |  |

|     |                                                                                                         |  |
|-----|---------------------------------------------------------------------------------------------------------|--|
| 242 | MIFLONIDE BREEZHALER (MIFLONIDE), inhalation powder, hard capsules, 60 capsules (+ inh.), 5909990926312 |  |
| 243 | VITAMINUM B 12 WZF, solution for injection, 5 ampulesa 2ml, 5909990244010                               |  |
| 244 | APO-NAPRO, tablets, 30 tablets , 5909990661442                                                          |  |
| 245 | TULIP, film-coated tablets, 30 tablets , 5909990998913                                                  |  |
| 246 | VALSACOR 80, film-coated tablets, 28 tablets , 5909990074945                                            |  |
| 247 | UPROX, modified-release capsules hard, 30 capsules, 5909990566068                                       |  |
| 248 | FOSTEX, pressurised inhalation, solution, 180 actuations, 5909990054152                                 |  |
| 249 | ZOFENIL 30, film-coated tablets, 28 tablets, 5909991129439                                              |  |
| 250 | EFFERALGAN CODEINE, tablets musujace, 16 tablets , 5909990678020                                        |  |
| 251 | KALDYUM, prolonged-release capsules hard, 50 capsules, 5909990822119                                    |  |
| 252 | BI-PROFENID, modified-release tablets, 20 tablets , 5909990412112                                       |  |
| 253 | RUTINACEA COMPLETE, tablets, 30 tablets, 5902020845201                                                  |  |
| 254 | EUTHYROX N 50, tablets, 50 tablets, 5909991051211                                                       |  |
| 255 | EFFOX LONG 50, prolonged-release tablets, 30 tablets, 5909990368624                                     |  |
| 256 | GLUCOPHAGE 500 MG, film-coated tablets, 30 tablets, 5909990789276                                       |  |
| 257 | GLUCOPHAGE XR, prolonged-release tablets, 30 tablets , 5909990624751                                    |  |
| 258 | AULIN, tablets, 30 tablets , 5909990411337                                                              |  |
| 259 | ACCU-CHEK ACTIVE, test strips, 50 pieces, 4015630056316                                                 |  |
| 260 | TRIFAS 10, tablets, 30 tablets, 5909990471324                                                           |  |
| 261 | LOPERAMID WZF, tablets, 30 tablets, 5909990038220                                                       |  |
| 262 | TORAMIDE, tablets, 30 tablets , 5909991162115                                                           |  |
| 263 | MUCOFLUID, nasal spray, solution, 12,5 ml, 5909990184415                                                |  |
| 264 | TARDYFERON-FOL, film-coated modified-release tablets, 30 tablets, 5909990668816                         |  |
| 265 | DORETA, film-coated tablets, 90 tablets, 5909991143923                                                  |  |
| 266 | CONTROLOC 20, gastro-resistant tablets, 14 tablets , 5909990478767                                      |  |
| 267 | ABRA, test strips, 50 szt., 5907581253625                                                               |  |

|     |                                                                             |  |
|-----|-----------------------------------------------------------------------------|--|
| 268 | CEROXIM, film-coated tablets, 20 tablets, 5909991263416                     |  |
| 269 | POLOCARD, film-coated gastro-resistant tablets, 60 tablets , 5909990654987  |  |
| 270 | ATORIS, film-coated tablets, 90 tablets, 5909990419173                      |  |
| 271 | ZARANTA, film-coated tablets, 28 tablets , 5909990777785                    |  |
| 272 | ALVESCO 160, pressurised inhalation, solution, 120 actuation, 5909990212064 |  |
| 273 | POLPRAZOL PPH, gastro-resistant capsules, hard, 28 capsules , 5909990077731 |  |
| 274 | BETALOC ZOK 50, prolonged-release tablets, 28 tablets , 5909990738632       |  |
| 275 | ACIDUM FOLICUM RICHTER, tablets, 30 tablets, 5909990109319                  |  |
| 276 | CONCOR COR 1,25, film-coated tablets, 28 tablets , 5909990858910            |  |
| 277 | BELLERGOT, tablets drażowane, 30 tablets , 5909990336418                    |  |
| 278 | PANPRAZOX, gastro-resistant tablets, 28 tablets, 5909990817184              |  |
| 279 | RANLOSIN, prolonged-release capsules, 30 capsules, 5909990048007            |  |
| 280 | CAVINTON FORTE, tablets, 90 tablets, 5909991028923                          |  |
| 281 | PROKIT, film-coated tablets, 40 tablets, 5909991240578                      |  |
| 282 | CAPTOPRIL, tablets, 30 tablets, 5909990044030                               |  |
| 283 | WARFIN, tablets, 100 tablets, 5909990622382                                 |  |
| 284 | THIOCODIN, tablets, 10 tablets, 5909990240012                               |  |
| 285 | POLVERTIC, tablets, 60 tablets , 5909990646036                              |  |
| 286 | TRIFAS COR, tablets, 30 tablets, 5909990471225                              |  |
| 287 | LORATADYNA GALENA, tablets, 30 tablets , 5909990795420                      |  |
| 288 | DICLODUO COMBI, modified-release hard capsules, 30 capsules , 5909991220594 |  |
| 289 | BUDIXON NEB, nebuliser suspension, 20 x 2ml, 5906414002522                  |  |
| 290 | MONURAL, granules for oral solution, 1 sachets a 8g, 5909990699117          |  |
| 291 | EUTHYROX N 25, tablets, 100 tablets , 5909991051129                         |  |
| 292 | SPASMOLINA, capsules hard , 20 capsules, 5909990456314                      |  |
| 293 | ARGOSULFAN, cream, 40 g, 5909990237319                                      |  |
| 294 | LIPOMAL, syrup, 125 g, 5909991034719                                        |  |

|     |                                                                                    |  |
|-----|------------------------------------------------------------------------------------|--|
| 295 | METOCLOPRAMIDUM POLPHARMA, tablets, 50 tablets ,<br>5909990084722                  |  |
| 296 | GROPRINOSIN, syrup, 150 ml, 5909991095697                                          |  |
| 297 | MULTILAC, capsules, 10 capsules , 5908222562595                                    |  |
| 298 | TAMISPRAS, prolonged-release tablets, 30 tablets, 5909990980451                    |  |
| 299 | PRESTARIUM 10 MG, film-coated tablets, 30 tablets, 5909990336081                   |  |
| 300 | NASOMETIN, nasal spray, suspension, 1 but.a 140actuations (18 g),<br>5909991309206 |  |
| 301 | VICEBROL, tablets, 100 tablets, 5909990223305                                      |  |
| 302 | SUMAMED FORTE, powder for oral suspension, 20 ml , 5909990742219                   |  |
| 303 | TROSICAM, orodispersible tablets, 20 tablets, 5909990866625                        |  |
| 304 | NYSTATYNA TEVA, granules for oral suspension, 24 ml,<br>5909990231515              |  |
| 305 | TELMIZEK, tablets, 28 tablets, 5909990902095                                       |  |
| 306 | TOBEX, eye drops, solution, 5 ml, 5909990189410                                    |  |
| 307 | syrup PRAWOŚLAZOWY ALTE, -, 125 g, 5909990024469                                   |  |
| 308 | AZYCYNA, film-coated tablets, 6 tablets, 5909991098421                             |  |
| 309 | NOLIPREL FORTE, film-coated tablets, 30 tablets , 5909990055029                    |  |
| 310 | TASECTAN, sachets, 20 sachets, 3830044941048                                       |  |
| 311 | ACC 200, tablets musujące, 20 tablets, 5909990331314                               |  |
| 312 | ZAHRON, film-coated tablets, 28 tablets, 5909990802685                             |  |
| 313 | OSPAMOX 1000 MG, film-coated tablets, 20 tablets, 5909990778041                    |  |
| 314 | FASTUM, żel, 60 g, 5909997199979                                                   |  |
| 315 | BIOPRAZOL, capsules hard, 28 capsules, 5909990880225                               |  |
| 316 | DETREOMYCYN 2%, ointment, 5 g , 5909990328611                                      |  |
| 317 | ENTEROL 250, capsules, 20 capsules, 5909990748426                                  |  |
| 318 | RIDLIP, film-coated tablets, 28 tablets, 5909991000141                             |  |
| 319 | DIAGNOSTIC GOLD STRIP, test strips, 50 pieces, 5906881862681                       |  |
| 320 | ALERPROF, tablets, 30 tablets , 5909991351939                                      |  |
| 321 | AVEDOL, film-coated tablets, 30 tablets , 5909990074051                            |  |
| 322 | GLUCOPHAGE XR, prolonged-release tablets, 60 tablets,<br>5909990213436             |  |

|     |                                                                                        |  |
|-----|----------------------------------------------------------------------------------------|--|
| 323 | AUGMENTIN, powder for oral suspension, 70 ml (10,6 g),<br>5909990419326                |  |
| 324 | AMOTAKS DIS, tablets, 16 tablets , 5909991043728                                       |  |
| 325 | POLOCARD, film-coated gastro-resistant tablets, 30 tablets ,<br>5909990654970          |  |
| 326 | BISOCARD, film-coated tablets, 60 tablets, 5909990804528                               |  |
| 327 | BETO 50 ZK, prolonged-release tablets, 28 tablets , 5909990220809                      |  |
| 328 | FINASTER, film-coated tablets, 90 tablets , 5909990811045                              |  |
| 329 | NYSTATYNA TEVA, granules for oral suspension, 28 ml ,<br>5909991307240                 |  |
| 330 | INDIX COMBI, film-coated tablets, 30 tablets, 5909991050344                            |  |
| 331 | ATORVASTEROL, film-coated tablets, 30 tablets, 5909990077847                           |  |
| 332 | HYDROXYZINUM ADAMED, film-coated tablets, 30 tablets,<br>5909991278892                 |  |
| 333 | ASPARGIN, tablets, 50 tablets, 5909990210718                                           |  |
| 334 | FROMILID UNO, modified-release tablets, 5 tablets, 5909991109813                       |  |
| 335 | ROMAZIC, film-coated tablets, 30 tablets, 5909990919574                                |  |
| 336 | CO-VALSACOR, film-coated tablets, 28 tablets, 5909990740277                            |  |
| 337 | OLFEN 75, solution for injection, 5 ampules a 2ml, 5909990161119                       |  |
| 338 | EUTHYROX N 100, tablets, 100 tablets , 5909991051426                                   |  |
| 339 | ROSWERA, film-coated tablets, 28 tablets, 5909990895533                                |  |
| 340 | VESSEL DUE F, soft capsules, 50 capsules, 5909990039616                                |  |
| 341 | CAPTOPRIL POLFARMEX, tablets, 30 tablets , 5909990830817                               |  |
| 342 | CLEMASTINUM AFLOFARM, syrup, 100 ml, 5909990955510                                     |  |
| 343 | THEOSPIREX RETARD, film-coated prolonged-release tablets, 50<br>tablets, 5909990803910 |  |
| 344 | TIALORID, tablets, 50 tablets, 5909990206025                                           |  |
| 345 | ZAFIRON, inhalation powder, hard capsules, 120 capsules,<br>5909990937981              |  |
| 346 | AMOKSIKLAV, powder for oral suspension, 140 ml (35 g),<br>5909990894833                |  |
| 347 | NOLPAZA 20, gastro-resistant tablets, 56 tablets , 5909990075041                       |  |
| 348 | ACIDOLAC BABY, oral drops, 10 ml, 5903060605626                                        |  |

|     |                                                                                  |  |
|-----|----------------------------------------------------------------------------------|--|
| 349 | ATRODIL, pressurised inhalation, solution, 10 ml (200 actuations), 5909991185879 |  |
| 350 | AXTIL, tablets, 30 tablets , 5909990337958                                       |  |
| 351 | MEMOTROPIL, film-coated tablets, 60 tablets , 5909990873746                      |  |
| 352 | HEVIRAN, film-coated tablets, 30 tablets , 5909990840113                         |  |
| 353 | VIVACE 5 MG, tablets, 30 tablets , 5909990610495                                 |  |
| 354 | VIVACE 10 MG, tablets, 30 tablets , 5909990610532                                |  |
| 355 | FUROCEF, film-coated tablets, 14 tablets, 5909991231217                          |  |
| 356 | DEBRETIN, film-coated tablets, 100 tablets, 5909990927043                        |  |
| 357 | RUPAFIN, oral solution, 120 ml , 5909990991921                                   |  |
| 358 | MELOXISTAD, tablets, 20 tablets, 5909990431168                                   |  |
| 359 | LISIPROL, tablets, 28 tablets , 5909990682447                                    |  |
| 360 | BIOSOTAL 40, tablets, 60 tablets , 5909990365715                                 |  |
| 361 | NONPRES, film-coated tablets, 30 tablets, 5909991014728                          |  |
| 362 | SUMAMED FORTE, powder for oral suspension, 30 ml , 5909990742226                 |  |
| 363 | NOLPAZA 40, gastro-resistant tablets, 28 tablets , 5909990075089                 |  |
| 364 | AMLOPIN 10 MG, tablets, 30 tablets , 5909990048977                               |  |
| 365 | HELICID 20, gastro-resistant capsules, hard, 28 capsules , 5909990420629         |  |
| 366 | ROTICOX, film-coated tablets, 30 tablets, 5909991313104                          |  |
| 367 | ROMAZIC, film-coated tablets, 30 tablets, 5909990919659                          |  |
| 368 | RUPAFIN 10, tablets, 15 tablets , 5909990083268                                  |  |
| 369 | XARELTO 20, film-coated tablets, 28 tablets, 5909990910724                       |  |
| 370 | NITRENDYPINA EGIS, tablets, 60 tablets, 5909990694754                            |  |
| 371 | AVAMYS, nasal spray, suspension, 120 actuations, 5909990076765                   |  |
| 372 | ATORVASTEROL, film-coated tablets, 30 tablets, 5909990078028                     |  |
| 373 | ACTELSAR, tablets, 28 tablets, 5909990891863                                     |  |
| 374 | KIDOFEN DUO, oral suspension, 100 ml, 5909991067496                              |  |
| 375 | ACTELSAR, tablets, 28 tablets, 5909990891832                                     |  |
